# Supplementary material for: The genetic study of three population microisolates in South Tyrol (MICROS): study design and epidemiological perspectives
Source: PubMed Central journal article supplement (PMC1913911; doi:10.1186/1471-2350-8-29), 2007-06-05

Elevated Blood Pressure

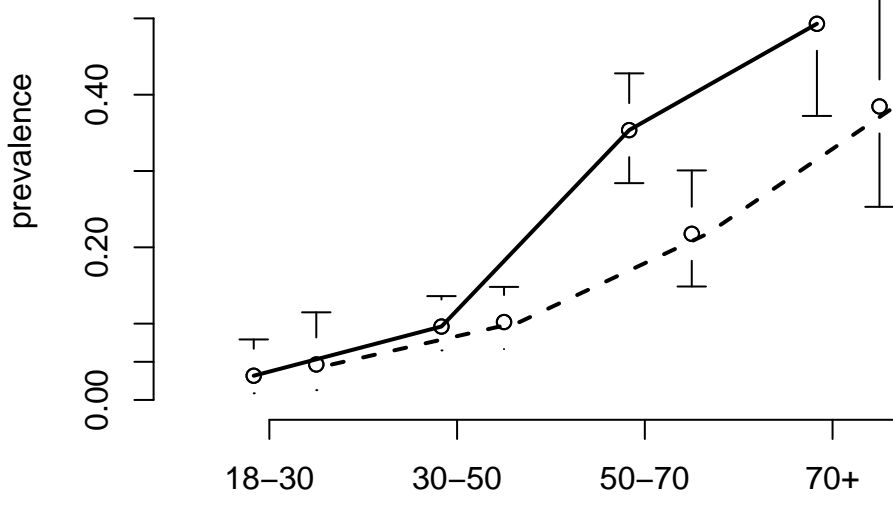

Angina Pectoris

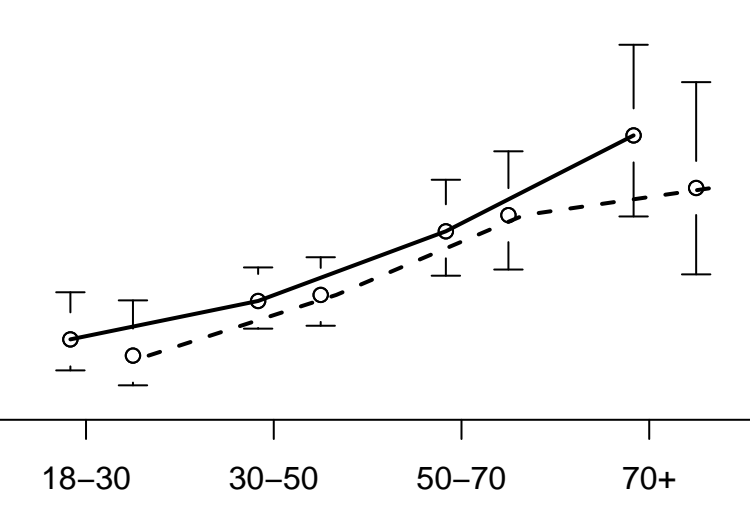

Cardiac Arrhythmias

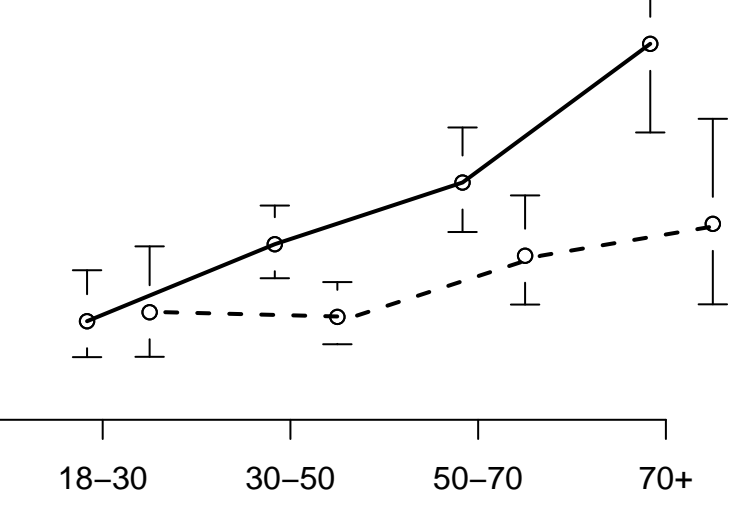

Ever Asthma

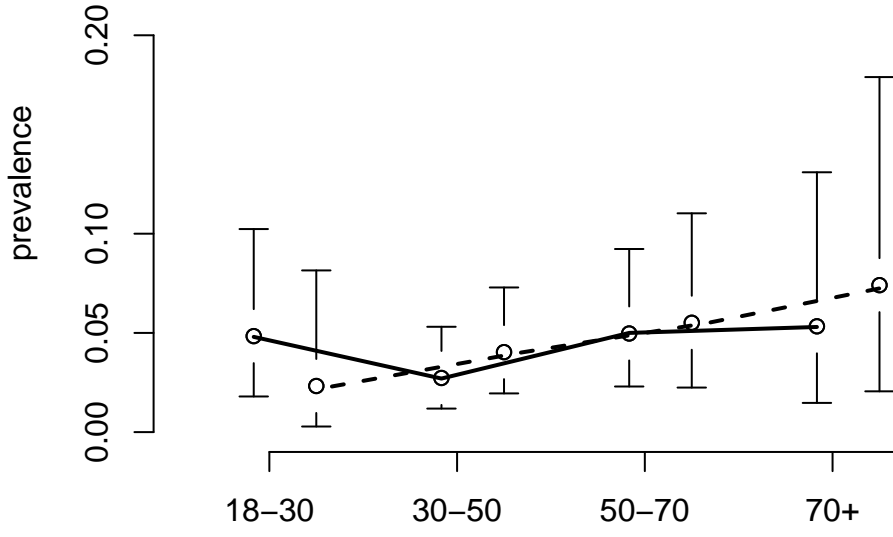

Chronic Bronchitis

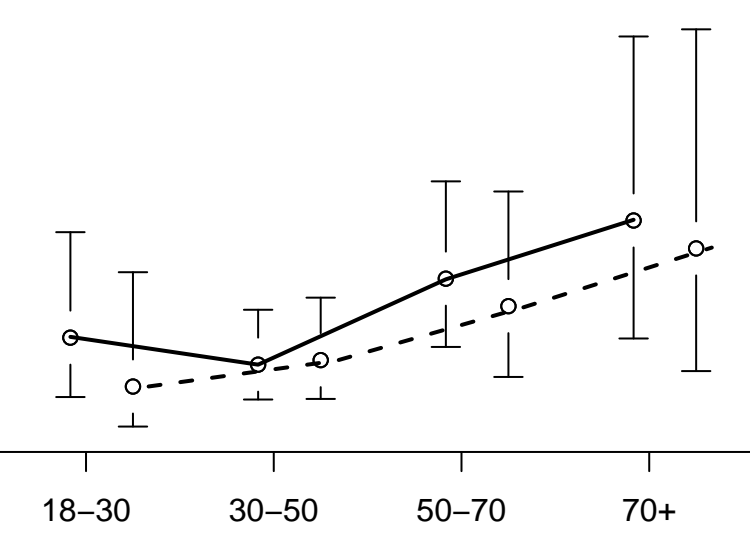

Hay Fever

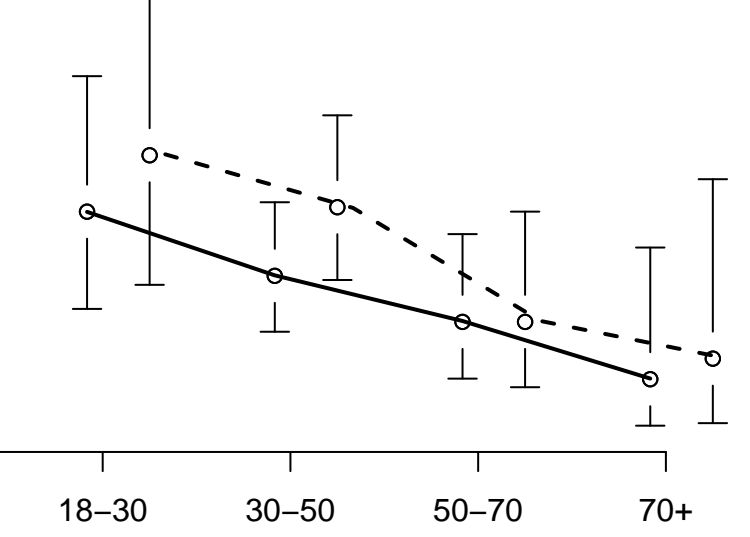

Supplement: 1471-2350-8-29-S1.pdf [file 1471-2350-8-29-S1.pdf]
