# Supplementary material for: The genetic study of three population microisolates in South Tyrol (MICROS): study design and epidemiological perspectives
Source: PubMed Central journal article supplement (PMC1913911; doi:10.1186/1471-2350-8-29), 2007-06-05

**BMI**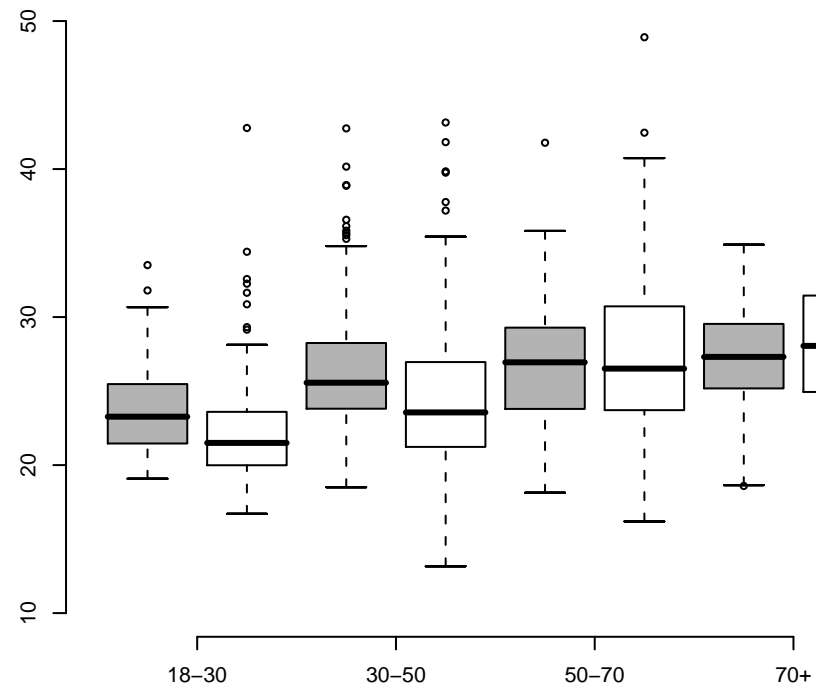**Waist (cm)**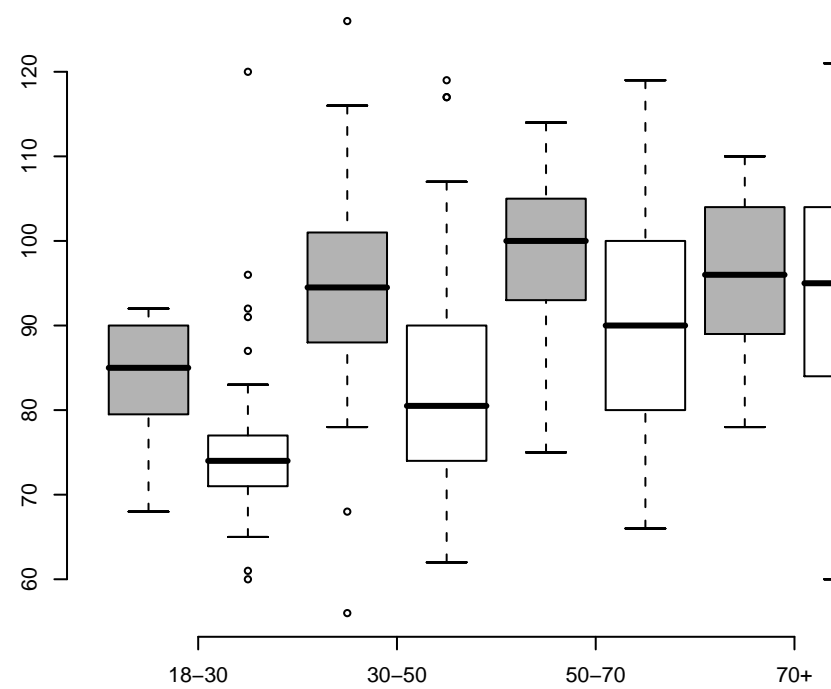**Cholesterol (mg/dl)**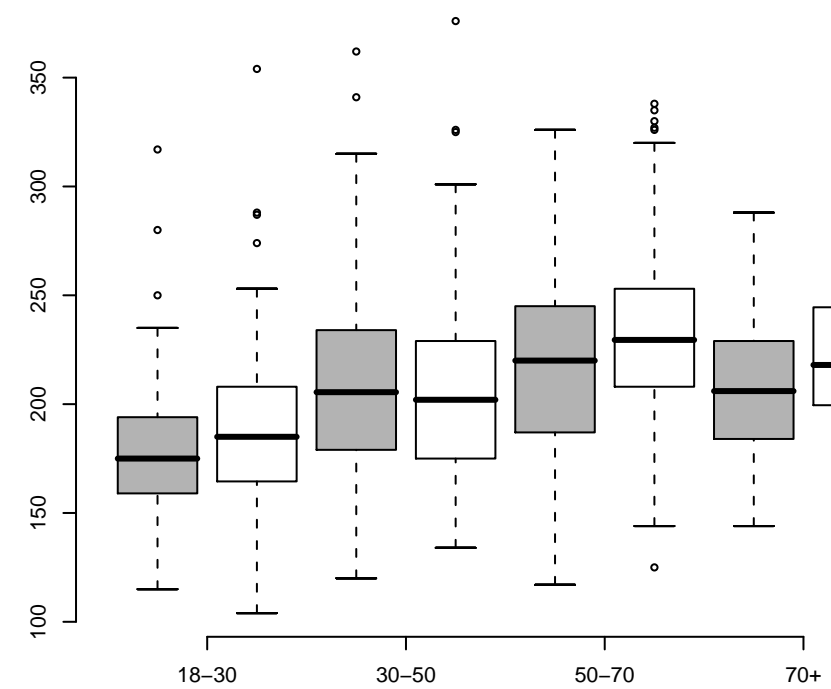**Hemoglobin (g/dl)**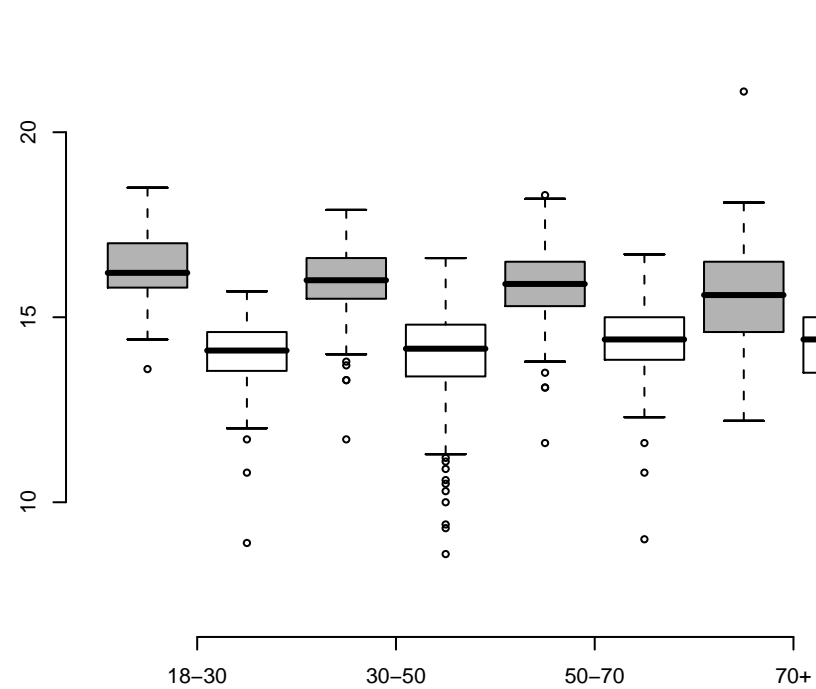**Ferritin (ng/ml)**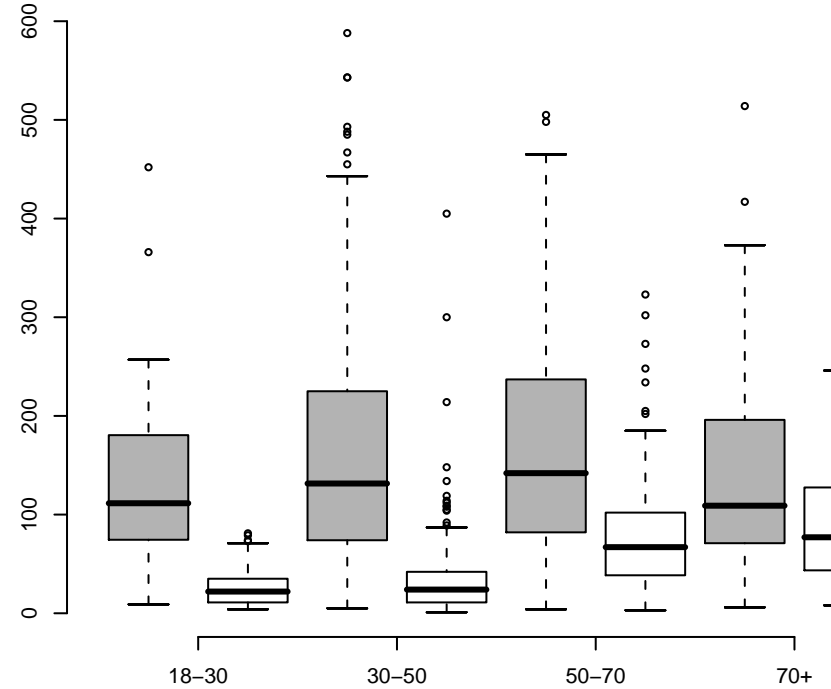**Glucose (mg/dl)**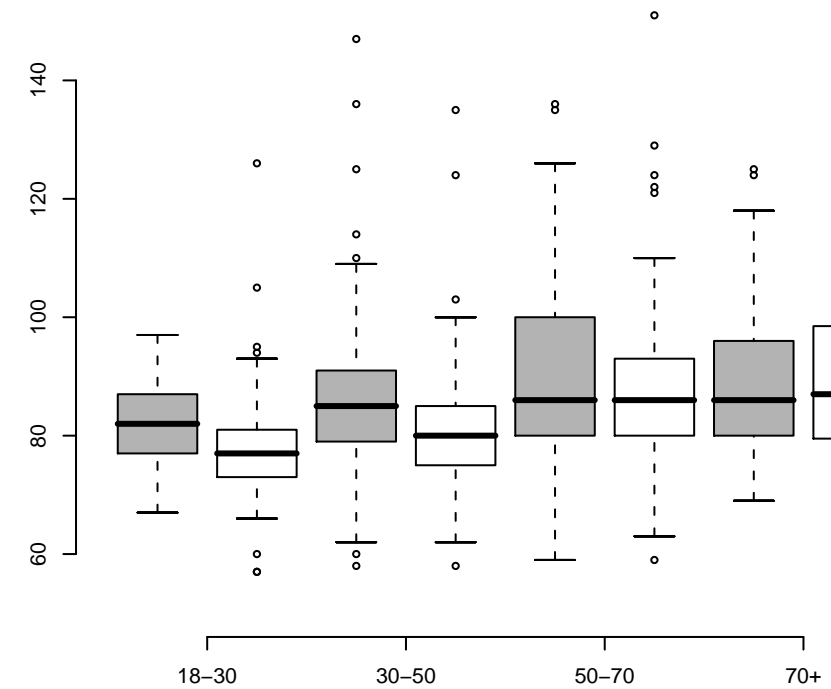

Supplement: 1471-2350-8-29-S2.pdf [file 1471-2350-8-29-S2.pdf]
