# Supplementary material for: The genetic study of three population microisolates in South Tyrol (MICROS): study design and epidemiological perspectives
Source: PubMed Central journal article supplement (PMC1913911; doi:10.1186/1471-2350-8-29), 2007-06-05

GOT (U/l)

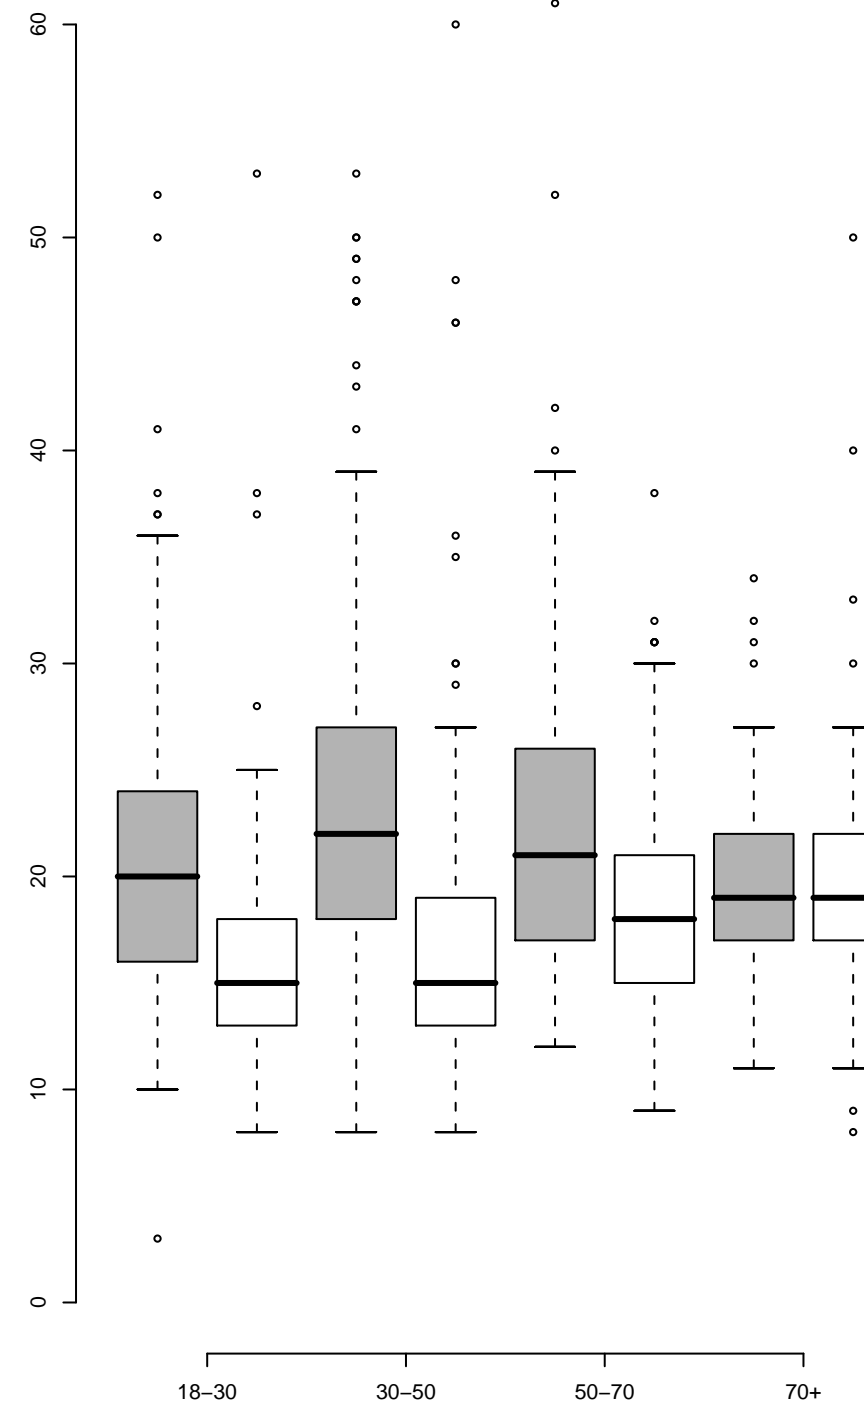

GPT (U/l)

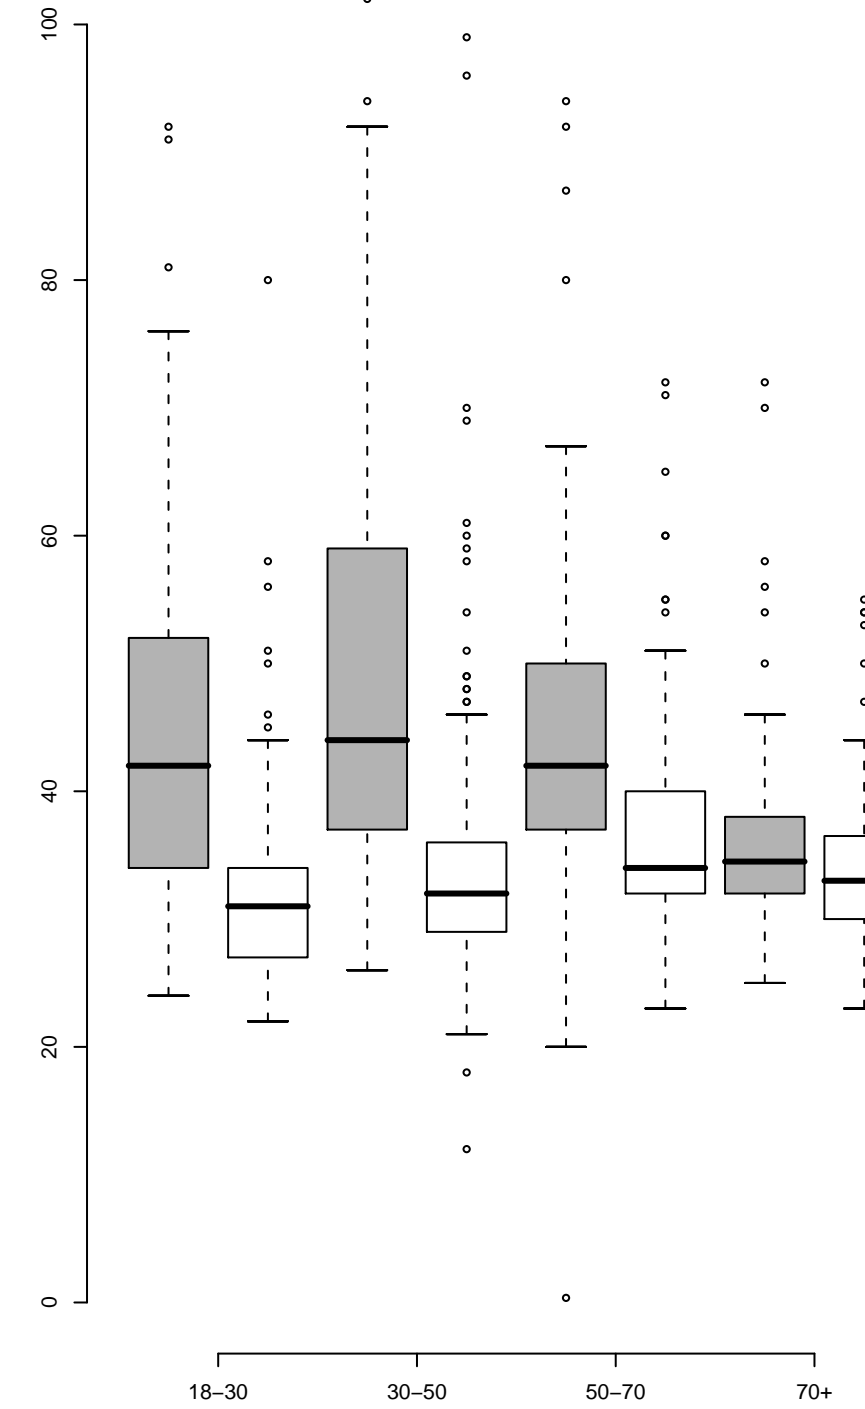

GGT (U/l)

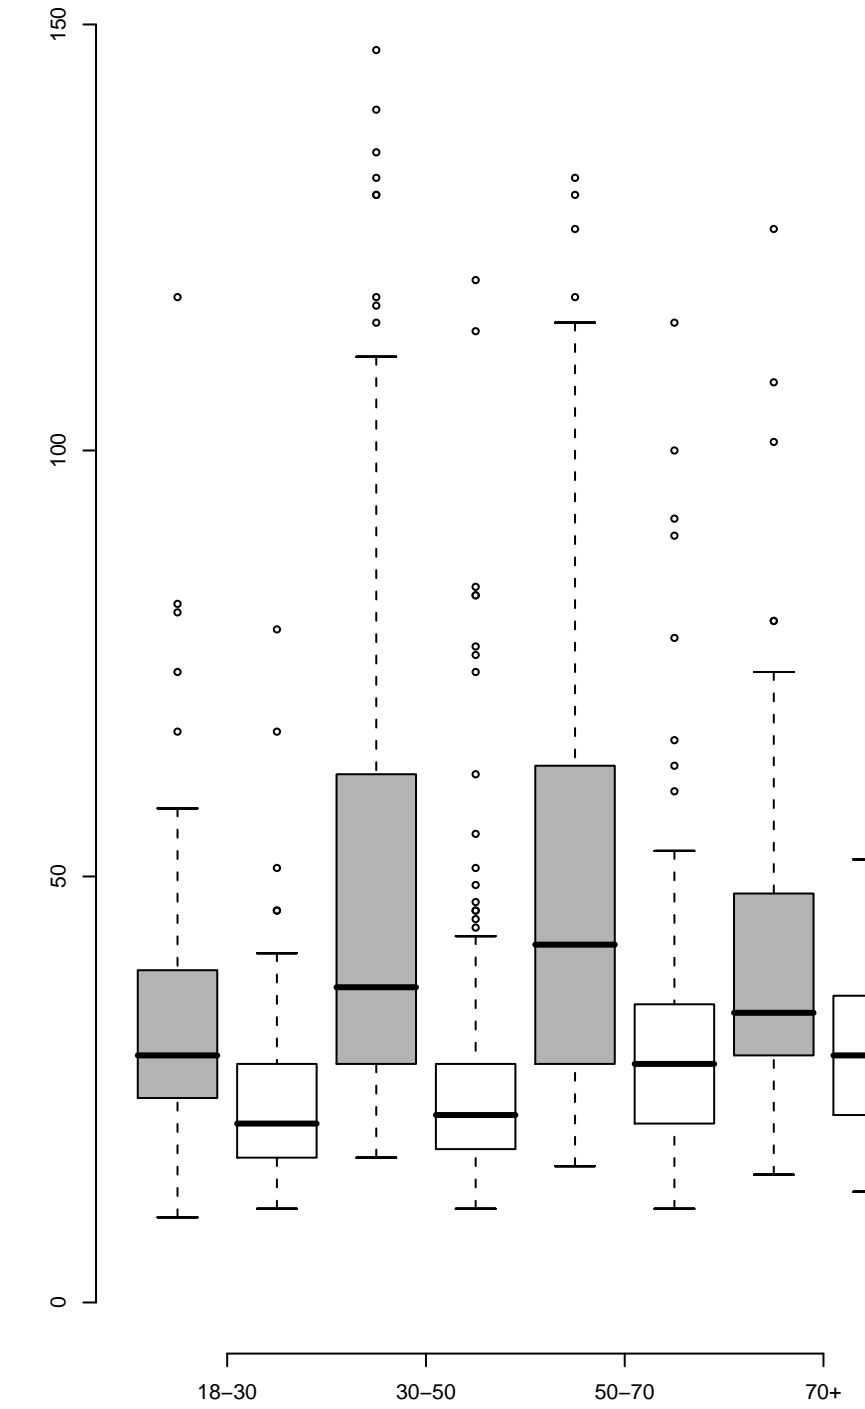

Supplement: 1471-2350-8-29-S3.pdf [file 1471-2350-8-29-S3.pdf]
